# Supplementary material
Source: Springer Nature journal article supplement (https://www.springermedizin.de/resource/supplementary/12889_2012_4802_MOESM1_ESM.pdf/9493674)
Supplement: MOESM1 [file 9493674]

Eligible reviews identified  
n=214\*

Reviews reporting significant  
effect of intervention  
n=91

Non effective/non significant/  
inconclusive reviews  
n=117\*\*

Eligible reviews\*\*  
Grade 1++, 1+ & 1-  
n=48

Non effective/non  
significant/inconclusive reviews  
Grade 1++, 1+ & 1-  
n=74

Application of Quality  
Assessment  
Low (n= 3)  
Medium (n=9)  
High (n=36)

Reviews reporting interventions  
with no effect (high quality only)  
n=6

High quality reviews eligible\*\*  
for inclusion  
n=36

Pre conceptual  
0

Antenatal  
20

Intranatal  
5

Postnatal  
11
